# Supplementary material for: Impact of tumor sidedness on survival and recurrence patterns in colon cancer patients
Source: PubMed Central journal article supplement — Ann Surg Treat Res. 2019 May 29;96(6):296–304. doi: 10.4174/astr.2019.96.6.296 (PMC6543053; doi:10.4174/astr.2019.96.6.296), 2019-05-29
Supplement: astr-96-296-s001.pdf [file astr-96-296-s001.pdf]

**Supplementary Table 1.** Microsatellite instability status in stage I, II, and III patients

| Variable  | LCC (n = 672) | RCC (n = 530) | P-value |
|-----------|---------------|---------------|---------|
| Stage I   |               |               | <0.001  |
| MSS/MSI-L | 89 (93.7)     | 59 (72.0)     |         |
| MSI-H     | 6 (6.3)       | 23 (28.0)     |         |
| Stage II  |               |               | <0.001  |
| MSS/MSI-L | 236 (90.1)    | 170 (74.9)    |         |
| MSI-H     | 26 (9.9)      | 57 (25.1)     |         |
| Stage III |               |               | 0.021   |
| MSS/MSI-L | 269 (93.7)    | 163 (87.6)    |         |
| MSI-H     | 18 (6.3)      | 23 (12.4)     |         |

Values are presented as number (%).

LCC, left-sided colon cancer; RCC, right-sided colon cancer; MSS, microsatellite stable;

MSI-L, microsatellite instability-low; MSI-H, microsatellite instability-high.
