# Supplementary material for: Impact of tumor sidedness on survival and recurrence patterns in colon cancer patients
Source: PubMed Central journal article supplement — Ann Surg Treat Res. 2019 May 29;96(6):296–304. doi: 10.4174/astr.2019.96.6.296 (PMC6543053; doi:10.4174/astr.2019.96.6.296), 2019-05-29
Supplement: astr-96-296-s002.pdf [file astr-96-296-s002.pdf]

**Supplementary Table 2.** Treatment for colon cancer recurrence in stage III patients

|                                             | LCC (n = 74) | RCC (n = 77) | P-value |
|---------------------------------------------|--------------|--------------|---------|
| Treatment for recurrence                    |              |              | 0.383   |
| Curative resection                          | 37 (50.0)    | 31 (40.3)    |         |
| Palliative chemotherapy and/or radiotherapy | 29 (39.2)    | 33 (42.9)    |         |
| No further treatment                        | 8 (10.8)     | 13 (16.9)    |         |

Values are presented as number (%).

LCC, left-sided colon cancer; RCC, right-sided colon cancer.
